# Supplementary material for: Heterologous expression and functional characterization of Drosophila suzukii OR69a transcript variants unveiled response to kairomones and to a candidate pheromone
Source: Research Square preprint supplement (doi:10.21203/rs.3.rs-1537518/v1), 2022-04-21
Supplement: Supplementary file 1 [file 5e237fea62ce94148e1b9350.docx]

>DsuzOR69a-genomic locus

ttttagtttcactttcattaaaatcagcaatcgataaatatatgtatttatatagaatggcaaaataaatatatatttctaattaaagaaagcgttttctcccacatcttaaacatatacgttatttctaaaagatttatatgccacatcctcttttggacaaatggcgtacagaaaatacgaatctgagcagacttgcttatcaaaacaaataaattcctccggctaaatgtgttcatttatcttaatttaggagtttagaatgccaagcgagcgggggagttgaataataatttttcacactattttcatagatccttgtcaaaataggatagcgcctcaggaagccggaagtccgagcagctggtccaaagctggcccagagcgtttaatttccatggagctgcacataaatttcccagttggctgtaatttctaaccatgggattggtaaacctttttgtggaagtaaacaagttgcagctcggaattcgctttcaatgcgaatttatggccattgccctcacctttggccagccgtttattttatttttccatcttctggggtaatttatttcgagagcagccaaaacaaacgcgttaatttcccaaattagtagcatgtgttgttcgcctttcaccggggcttaattagtttaaaaggcccgccgggcggatcgataagtccaacagttgctagttgtctgagttggtttcgccataactttgccgtacttttgcacttgtcagcgtccaggacgaaggagatgaattggagcagcttctgccaagaggcccggagtcgatgtagtggcccttggctcgtggatctccataaattcctggccagaaagatgcgctggctgccaaaactattactcacactcctccgccaacggcgacggacggataattcaaattgtccattacgcgcagctgccgctcgatttgagtccattggcaattggccgggtactcgggcgggactgcgaatcctgccaacttttccgcctttgtttgtcttcataaattttactttcgccggatgtttcaactgaatttaagtcattcaacggagtacggggaattcggcggctaattgcgaatcaacagaagctcgattaaaaagaaacgccaatgccaatcaataaaaacaattgaaaaccaatcagagtttaattaccgcaacaaaacgctgatgagacgtcgacagtaaacagaaaatcccgaacccgcacaaggagcaaaatcaccaaaccataaatcaatagcaaacaaaaaacgctcctggatgaagaggggcagcacatatcctgggttatttcctggggtctggggtctgggtccttagagcatggagcatatgaggcgcaaccaagtagaccgcagaataaaggcaacaataaaaaaaaactggcaatggatcggactcgtaaaagagcgggggccttggggatgcccataaacaaagaagtaaacaagcgccaagtacaatacacatgctccgacatgcaggcacagcatatatgtggctgtacataaaaacgtctccttgggtggacttccgccggaaatggagtgcagaacgagcagcacttgtctgctgatatcagcagcgatagacgagcgcataaaagcctgctaaccagctcaaaggcatcatcattacgagcttgacacgaatataaaacaaggaagaacgctatagtcgagtacctcgactatcagatacccgttactcagctaaatggagatatgcaagcagcaaagcgagattaaaatgcgccacctaccggcggtagacagatttaagcgttatgggcgttagagtgggcgtggcaaatttatttttggataaatcgataggtattgacgacaccaatacatttcagttaaaattttttatttgcaattgctttaaatctggttttgttcaagtgctgattagcctattgaccaaacggatttctatgatttgggttaaccattaataataaatgcgtgccatataagcaaatctgaatgattcattatattgatttgttaaacgaacataagttcattagtcaactttatatcttttttaatagggtttttcacaaaactggcatcacatatttttttagtcaaaccagcagttggcttttcccaaggactaatttaatattgctcaattaggttgtgaaatctagtttagaactagttttttcatgggctattcagtcatacttgaaaccagc**ATGCAGTTGCACGACTATATGAGGTATA**TAGACCTGGCTTGCGGGATGGCTTGTATTCCAAGATATCAATGGTCTGGACGGCGCACAGAAAGGAAACCATATACGTTGGAAAGAAAAACTCTGCTCGTATTTGCTATTATCTGCTACACCTACCAGATTTTTGGAGTGATAACCTATTGGTATCGAAATGGGCGGAACGCAGAGGATACGGCCACGTTCGTCACAGAAATATCAGAAATGTGCGGTTCTCTTATGTTGATCGTTGTGGGATTCTCAAATTTTTATGCTCTCATAAAAAACCGTTCTCAGATCGAGGAAGTGTTCAAAGAGCTCCAGGAGATATATCCGTTAGCCGGAGACAGGCACTACCGTTGCCAGCACTACTATGACATGGCCATGCTAATAATGAAAGGCGAATTCATGTTCTATGTGGTCTTCTATGCGTACTACAATAGTGCCCCTCTTATGTTGCTGCTCTGGGAACACCTGCAGGAGGACCAGAATCTGAGTTTTAGGACGCAGACTAACACTTTGTTTCCCTGGAAGGTCCATGGATCTGCTCTGGGTTTCAGTGTGGCTATACTTACCTTAGCCATGATGTCATTTGTAGGCGTGGGCTTCAGCATAGCCACCCAGAATATAGTCTGCATATTTACTTTCCAACTGAAATTGCACTATGATGGAATGGCCAGTCAGTTACTTTCCCTCGATGCTCGTCAACCCAGAGCACATGAGCAGTTAAAGTATCTAATCGACTATCATTCTAGAATTCTACATATCGGAGATCAGTTTAATCAGATATTGAACTTCATATTCGGGAGCAGTATGGTTGGCTCTACAATTGCCGTTTGCATGACGAGCGTGGCTGTTATACTACTCGACTTGGACTCTGCTTTTAAGTACATGAGTGGTCTGATTGCCTTTGTCCTTTACAACTTCGTCATCTGCTACATGGGTACTGCGGTCACTTCTGCTgtaagtagtaatagtattagtaggttaagatatattatactctatggcaatcggaacagttgtcctttctcagcaccctaatatggctgcttaaaaattacccaattagacttgcaggctgacatatgtgagacctattacttagaagcattatctagttcctcacagtttaaaacagaATGCCGTTGATAGACTATATGAAGTATTTAGACCGGTCCTGTGAGATTGGATTTTCAGCTCCCTATCAATGGACTGGAGGACCAAAAGATAGAAACCAAGAAACAACAATCAGTAAAAATCTCTTCAAACTTTCCGTAATTTTGTTGACCTACCAGTTTGTTGGTATAATTACATATTTTTACTTGTTTGGCCGGACGGAAAAGGACGCGGTTAGATTCGTTACAGGACTTTCGGAAATGTGCGGCTCACTTATGTTAGTCTGTGTGGCATGCACCAATGTTTGGGCACTCACAAAGAACCGTCCTCATATTCAGGCGGTTTTCGGCGAGCTTCATGTGATGTATCCTAAGCCAAAAGATGATCGTTATAGGACCCAGCACTACCAAGATGTTGCGCTTTTTACAATGAAGTATCAGTATATACTGTACACCATCTTTTATCTGTACTATAATGGCGCGCCACTTTTGCTGCTTCTATGGGAGTATCTGATGGATAGACAGAACATGAGTTATAGGACGCAAACTAATATGTGGTTTCCCTGGAAGGTTAAAGGTTCAGCAATTGGATTTGCGCTGGCCATTTCTGTTCAAGCTTTTGCCTCCGTGGTGGGCGTGGCCTATTCTCTGAAATCCCTAAATATTGTTTGCATATTTACGTACCAACTGAAACTGCACTGTGACGCCTTGGCAAGCCAGCTACTCCGTTTGGACTCTCGGCTACCTGGATCCTATCAGGAACTAAGGATTTTGATCACTTACCATTGTCGTATCTTCGATATTGGAGAGCAAGTCAATCAGATCTTGAACTCTTATTTCCTGAGTAGCCTAATATTTTCTACTATCGCCATTTGTATGACAAGTGTTGCCGTACTGCTACTCGACTTTGCCTCTGCCTTTAAATATATCAGTGGCCTGGTGGCCTTCGTCCTCTACCACTTCGTCATTTGCTACATGGGCACCTCGATTACTGCAGCGgtaagtaatctttttgactttattgttggactaggtatattgtttttatatatagagagatctatatgagacggtcagaaaagttatctttattctggaacaatttagctagctggtgaagtaaaaatctcaaccttatcatgtgcaatttttcatttctgttttgctgacgtcactgttgccgtaatctagggaatatactatatagtaccttaaaaccagttgcctgttctcaggaactcaagtatagatgattaaaaattacccaattaggtcatgcagactgacgtataagaacgattgcatattgcgaaataatttcagtttcggttcagagcagg**ATGGAATTTCATGAGTATTTTGAGTATT**TTGACAGGAGCTGCCGTTTTACAATGGCGCCACGTTTTAAATGGAGTGGACGACCAGCGGAGAATGATTCTTATCCGCTGTTAAGAAAAACCTTCTTCTTACTGGGATCCTTTTGCTTGGGCTATCAGATTTTTGGAGTGATGATATATTGGCTGTTATTTGACCGGAAGGCAGAGGACACCCAAAAATTTGTGGCCGGGATCTCGGAGGCAACGGGGGCTCTGATGCTCGTCTCTGTGGGATTTTACAATATATGTGCCCTTCAATATCATCGCACTGAGATCGAGGAGCTGCTGACGGACCTAATGGAGCTGTATCCAAGACCCAGAGAGAGACACTATCGCTGCCGGCATTACCACAAATTGGCCAATGGCTTCATGAAATTCGAGTTTGTATACTTTTGGATGTTTGTCCTGTACTACAACACTGCACCACTAGTGGTTTTACTGTACGAGCATCTGACGGAGGAAATGGATGTCAGCTATAAGACCCAGATTAACACCTGGTATCCCTGGAGAATCCATGGATCAGCAATTGGTTATGGACTAGGTCACTTTGCCACTTGCATCGCCTCGATTGCGGGCGTGGCATTCTCCTTGGGCACTCACAATCTTATCTGCATATTTACCTATCAGCTGAAGCTACACTTCGATGCTATAGCCAATCAATTACTCGAACTCGACTCTCGTCATCCAGGTGCCAATCAGGAGTTGAGAAGGCTAATCGCATACCACAGTCATGTCGTTCGGATTGCCGATGAATTTAATGAAGTAATGAACTTTTCCTTTCTTGGAGGCCTGTTATTTTCCACAATAGCTCTTTGCATGACGAGTGTGGCTATTCTACTCCTCGATTTGGTATCTGCCTTTAAATGCGTTAATGGTCTAGTTGCATTTATCGTTTACAACTTTGTAATCTGCTTTTTGGGCACTGAGTTCTCCATAGGGgtaagttgagacgataaaataatactgtgtttctcgaactttgcgaaaaagttaaagtttactggtgacaatatgattacaattagtcagatatatttaaataattataatttaaaaaaggttatttatacactatatatcaccttaaatttatataggaaaatctttaacattttttgagtgtattagtgttaatttcatcttcttatttcaaggtaccaaattggtattaaaatatttaagcactttgattcacaattaccctgactaagtgcttcccattgtgcatttaaaatcagagggctacccaaatgactctattaactaactgaaacagttgcacgttttcaccgtggattatcccaccaattactataatttgccagggaatacggttgcagaacccagtaataattcagtacgag**ATGCAGCTGGAGGACTTTATGTTCTATC**AGGACCTCGTGTCCCAAGGGGCCCAATTTCCAAGATTCGAGTGGAACGGCAGGCGATCTTTGGGAGTCAAGCGCAGTTTGCCAGGACGCATTATCTTCTGGTTCGGAGCAGTAAATCTGATATATCACAACATCGGATGCTTTATGTACGGTTATTTCGTTGATGGAAGTACCAAGGACCCAATTGAGTACATTGCCGAATTGGCAGCCGTGGGAGCCATGCTTGGATTTACCATCGTGGGCACCCTTAATTTATGGAAAATACTAAGCCTTAAGTCACAGATTGAGGAATTAATGGAGGAGTTCGAGAAGTTGTTTCAACTTACCAAAAGAAGACCATATCGCAGCCAACACTATTTCGAGTCGTACACGCGTTTTATAAGGATATTGGTTGTTTTCACTAGCAGTTGCATCGTCTACTACAATTTACTACCTAATATTCTCATGATTCGAGAACTTCTGATGGAATCGCAGGATTTGAGTTATCGCATTCAGAGCAGTGCCTGGTATCCTTGGAAGATCCAGGGATCAATTCCTGGATTCCTAGTTGCGGTCATCTGTCAGGCTTTTTCGTGCCAGACGAACCTATGTGTCATCATGTTTAGCCAGTTTCTGGTTAGCTTTTTTGGCATCCAGCTTGAAATTCACTTTGATGGATTGGCCAGACAGCTGGAAGCCATCGATGCAAAACATCCCTCTGCCAAAGAGCAGTTGAGGTCCCTCATCATATACCACAAGAAAATTTTGAACCTAGCGGACAGAGTAAACCGGATTTTTAATTTCACGTTTTTCATAAGCCTTTCGATATCCATGATTTCCATGTGTTTCTTGGCCTTTTCCGTGACCATGTTCGACTTGGGTACGGCCCTAAAGCATGTGCTCGGACTCTTAATATTCATGATTTATAATTATTGCATGTGTCGTAATGGGACATACCTAATTTTTGCGgtaagtttttaaagcatatttataaagtgtctttttatattagtttttaaaccagacagccccaaaaaaagggccttcgataccttagcagttgccatacaaatttcatcaattattatcaatattcaattttcgtacactgaatgtttagtaaattcctcttaaagattaaaaaagagatgtaaacccaacatttcccttgcatgggaactgacagaaatttataattgacagaataaccaatttgaagcagttgcttgttctcaggacattattcctgctgcgctgattgcctaattttagcaaatggatttttttttaagttctcagtatgaggtggccttccaacgATGCATTACGAGGATATTATACACTATACTGACATAGCCTGTCGATGGGCTCTGATGCCAAGATTTGAATGGAAGGGTCGAAAGTCACCGAGAGCCGAGGAAACATGGATACAAAAAATATTTTTCATAGCCGCTGCCATCAACCTAAGCTATTACAATGTTTCTTTCACTGTCTACGCCTATCAACTTGATCCGGAAACTACAGATCCTTTGATATATACTGGAAAGATTTCGGAGGCTGGCAGTATGCTGGGATTTGTCGTTTTAGGAACTCTTAATATGTTTTCACTTCTAATACTTAGGCCTCAGATTGAGAATGTGCTGGCAGAACTTCAGGATTTGTTTAATCAAAAATTAAAGAATACTTCTTCAGTCGGCTATCGTCTAAAGAAATCAATTCGATTGATGAGAAATTGTACTGTGTTATTTGCATTTGGTAACACCTACTACAACGTAATGCCTTTTATAAACATGGCTTACCAAATTCTAACGGACTCAAAGCAAGTTTCTTATATAATACAAAACGATGCTTGGTACCCCTGGAAAATTGGGGATTCTATTCCTGGTCTATGCGCTTTATATATAAGTCAAGCCCTGTCTTCAATACTAAATGTTGGCACTATTATAACTAATCAGTTATTGATACATGTCTGTACCATACAATTAGAACTACATTTCGATGGATTATCAAATCAACTGGAAAACTTAGATGCCAAGGACTTAAGAGCTAAGGGAATACTCATTTCACTAATTTGTTACCATCAGAGAATAATGCAGCTAGCGGACAGTATTAACGGAATTTTTAACTTTACCTTTTTGATTAGTTTAACTACTTCTACTATTGCCGTGTGCTCTATGTCCTTCACTTTAACCACGCTCGATATGATGACAGCTCTTAAATATACGGTGGGACTTCTTTTATTTATGATCTACACTTTTTCCCTATGTCACAATGGTACTCTGGTATCTTTGGCGgtaagaaagcataagggtattttttaagattatttattatgttatattatttgtacttaaggtattttaatgggatcatttgtttttttcagAGCGACAAAGTGTTGCCAGCTGCTTTTTATAACAATTGGTATGAGGGTGATCTTGCCTATCGCAAGATGCTGCTGATCTTGATGATGCGTGCTACAAAACCTTATGTGTGGAGAACCTACAAGCTAGCACCTGTGTCGATTACCACCTATATGGCAgtgagtttttacttaaatgtactctgttattttaaggttttaaattatattttcttacagACTTTGAAGTTTTCTTATCAAAT**GTTTACCTGCGTGCGTTCCCTGAAATAA**acaggaaaaaaagtaatcacaaaagagtctagctctgaaaatatattaaacaaacacaaagatttagaatgcttaccacttactctctgcttaaaatcaatttttgcttttaaaatatatctagccaaaataaacatgaatttaaacatgaatttcgggtatgctagtttcagtaccccatagaaatacatttctcttcaaaaaatgtttaaaaaatattaaatgtataacatttattagctggaaaacatttatattaggcctaaggctaattaaaaattccttaaattcgtgagaaaccccaacgagttgacccattaactttttattaaaattaacaaattctttagatattttaatgagatctcttttttcagAGTGACAAAGTGTTGCCAGCTGCTTTTTATAACAATTGGTATGAGGGTGATCTTGCCTATCGCAAGATGCTGCTGATCTTGATGATGCGTGCTACAAAACCTTATGTGTGGAGAACCTACAAGCTAGCACCTGTGTCGATTACCACCTATATGGCagtgagtttttacttaaatgtactctgttattttaaggttttaaattatattttcttacagACTTTGAAGTTTTCTTATCAAATGTTTACCTGCGTGCGTTCCCTGAAATAa

Legend (for a schematic detail, see Figure 1 A):

DsuzOR69aA

DsuzOR69aB

DsuzOR69aC

DsuzOR69aD

DsuzOR69aE

Coding sequences

>DsuzOR69aA

ATGCAGTTGCACGACTATATGAGGTATATAGACCTGGCTTGCGGGATGGCGTGTATTCCAAGATATCAATGGTCTGGACGGCGCACAGAAAGGAAACCATATACGTTGGAAAGGAAAACTCTTCTCGTATTTGCTATTATCTGCTACACCTACCAGATTTTTGGAGTGATAACCTATTGGTATCGAAATGGGCGGAAGGCAGAGGATACGGCCACGTTCGTCACAGAAATATCAGAAATGTGCGGTTCTCTTATGTTGATCGTTGTGGGATTCTCAAATTTTTATGCTCTCATAAAGAACCGTTCTCAGATCGAGGAAGTGTTCAAAGAGCTCCAGGAGATATATCCGTTAGCCGGAGACAGGCACTACCGTTGCCAGCACTACTATGACATGGCCATGCTAATAATGAAAGGCGAATTCATGTTCTATGTGGTCTTCTATGCGTACTACAATAGTGCCCCTCTTATGTTGCTGCTCTGGGAACACCTGCAGGAGGACCAGAATCTGAGTTTTAGGACGCAGACAAACACTTTGTTTCCCTGGAAGGTCCATGGATCTGCTCTGGGTTTCAGTGTGGCTATACTTACCTTAGCCATGATGTCATTTGTAGGCGTGGGCTTCAGCATAGCCACCCAGAATATAGTCTGCATATTTACTTTCCAACTGAAATTGCACTATGATGGAATGGCCAGTCAGTTACTTTCCCTCGATGCTCGTCAACCCAGAGCACATGAGCAGTTAAAGAATCTAATCGCCTATCATTCTAGAATTCTACATATCGGAGATCAGTTTAATCAGATATTGAACTTCATATTCGGGAGCAGCATGGTTGGATCTACAATTGCCGTTTGCATGACGAGCGTGGCTGTTATACTACTCGACTTGGACTCTGCTTTTAAGTACATGAGTGGTCTGATTGCCTTTGTCCTATACAACTTCGTCATCTGCTACATGGGTACTGCGGTCACTTCTGCTAGCGACAAAGTGTTGCCAGCTGCTTTTTATAACAATTGGTATGAGGGTGATCTTGCCTATCGTAAAATGCTGTTGATCTTGATGATGCGTGCTACAAAACCTTATGTGTGGAGAACCTACAAGCTAGCACCTGTGTCGATTACCACCTATATGGCAACTTTGAAGTTTTCTTATCAAATGTTTACCTGCGTGCGTTCCCTGAAATAA

>DsuzOR69aB

ATGCAGCTGGAGGACTTTATGTTCTATCAGGACCTCGTGTCCCAAGGGGCCCAATTTCCAAGATTCGAGTGGAACGGCAGGCGATCTTTGGGAGTCAAGCGCAGTTTGCCAGGACGCATTATCTTCTGGTTCGGAGCAGTAAATCTGATATATCACAATATCGGATGCTTTATGTACGGTTATTTCGTTGATGGAAGTACTAAGGACCCAATTGAATACATTGCCGAATTGGCAGCCGTGGGAGCCATGCTTGGATTTACCATCGTGGGCACCCTTAACTTATGGAAAATACTAAGCCTTAAGTCACATATTGAGGAATTAATGGAGGAGTTCGAGAAGTTGTTTCAACTTACCAAAAGAAGACCATATCGCAGCCAACACTATTACGAGTCGTACACGCGTTTTATAAGGATATTGGTTGTTTTCACTAGCAGTTGCATCGTCTACTACAATTTACTACCTAATATTCTCATGATTCGAGAACTTCTGACGGAATCGCAGGATTTGAGTTATCGCATTCAGAGCAGTGCCTGGTATCCTTGGAAGATCCAGGGATCTATTCCTGGATTCCTAGTTGCGGTCGTCTGTCAGGCTTTTTCCTGTCAGACGAACCTATGTGTCATCATGTTTAGCCAGTTTCTGGTTAGCTTTTTTGGCATCCAGCTCGAAATTCACTTTGATGGATTGGCCAGACAGCTGGAAGCCATCGATGCAAAACATCCCTCTGCCAAAGAGCAGTTGAGGTCCCTCATCATATACCACAAGAAAATTTTGAATCTAGCGGACAGGGTGAACCGGATTTTCAATTTCACGTTTTTCATAAGCCTTTCGATATCCATGATTTCCATGTGTTTCTTGGCCTTTTCCGTGACCATGTTCGACTTGGGTACGGCCCTAAAGCATGTGCTCGGACTCTTAATATTCATGATTTATAATTATTGTATGTGTCGTAATGGGACATACTTAATTTTTGCGAGCGACAAAGTGTTGCCAGCTGCTTTTTATAACAATTGGTATGAGGGTGATCTTGCCTATCGTAAAATGCTGTTGATCTTGATGATGCGTGCTACAAAACCTTATGTGTGGAGAACCTACAAGCTAGCACCTGTGTCGATTACCACCTATATGGCAACTTTGAAGTTTTCTTATCAAATGTTTACCTGCGTGCGTTCCCTGAAATAA

>DsuzOR69aC

ATGGAATTTCATGAGTATTTTGAGTATTTTGACAGGAGTTGCCGTTTTACAATGGCGCCGCGTTTTCAATGGAGTGGACGACCAGCGGAGAATGATTCTTATCCGCTGTTAAGAAAAACCTTCTTCTTACTGGGAACTATTTGCTTGGGCTATCAGATTTTTGGAGTGATGATATATTGGCTGTTATTTGACCGGAAGGCAGAGGACACCCAAAAATTTGTGGCCGGGATCTCGGAGGCAACGGGGGCTCTGATGCTCGTCTCTGTGGGATTTTACAATATATGTGCCCTTCAATATCATCGCACTGAGATCGAGGAGCTGCTGACGGACTTAATGGAGCTGTATCCAAGACCCAGAGAGAGAAACTATCGCTGCCGGCATTACCACAAATTGGCCAATGGCTTCATGAAATTCGAGTTTGTATACTTTTGGATGTTTGTCCTGTACTACAACACTGCGCCACTAGTGGTTTTACTGTACGAGCATCTGACGGATGAAATGGATGTCAGCTATAAGACCCAGATTAACACCTGGTATCCCTGGAGAATCCATGGATCAGCAATTGGTTATGGACTAGGTCACTTTGCCACTTGCATCGCCTCGATTGCGGGCGTGGCATTCTCCTTGGGCACCCACAATCTCATCTGCATATTCACCTATCAGCTGAAGCTCCACTTCGATGCTATAGCCAATCAATTACTCGAACTCGACTCTCGTCATCCAGGTGCCAATCAGGAGTTGAGAAGGCTAATCGCATACCACAGTCATGTTATTCGGATTGCCCATGAATTTAATGAAGTAATGAACTTTTCCTTTCTTGGAGGCCTGTTATTTTCCACAATAGCCCTTTGCATTACGAGTGTGGCTATTCTACTTCTCGATTTGGTATCTGCCTTTAAGTGCGTTAATGGTCTGGTTGCATTTATCGTTTACAATTTTGTCATCTGCTTTTTGGGCACTGAGTTCTCCATAGGGAGCGACAAAGTGTTGCCAGCTGCCTTTTATAACAATTGGTATGAGGGTGATCTTGCTTATCGCAAGATGCTGCTGATCTTGATGATGCGTGCTACAAAGCCTTATGTTTGGAGAACCTACAAGCTGGCACCTGTGTCGATTACCACCTATATGGCAACTTTGAAGTTTTCTTATCAAATGTTTACCTGCGTGCGTTCCCTGAAATAA

>DsuzOR69aD_NotCloned

ATGCCGTTGATAGACTATATGAAGTATTTAGACCGGTCCTGTGAGATTGGATTTTCAGCTCCCTATCAATGGACTGGAGGACCAAAAGATAGAAACCAAGAAACAAAAATCAGTAAAAATCTCTTCAAACTTTCCGTAATTTTGTTGACCTACCAGTTTGTTGGTATAATTACATATTTTTGCTTGTTTGGCCGAACGGAAAAGGACGCGGTTAGGTTCGTTACAGGACTTTCGGAAATGTGCGGCTCACTTATGTTAGTCTGTGTGGCATGCACCAATGTTTGGGCACTCACAAAGAACCGTCCTCATATTCAGGCGGTTTTCGGCGAGCTTCATGTGATGTATCCTAAGCCAAAAGATGATCGTTATAGGACCCAGCACTACCAAGATGTTGCGCTTTTTACAATGAAGTATCAGTATATACTGTACACCATCTTTTATCTGTACTACAATGGCGCCCCACTTTTGCTGCTTCTGTGGGAGTATCTGATGGATAGGCAGAACATGAGTTATAGGACGCAAACTAATATGTGGTTTCCCTGGAAAGTTAAAGGTTCAGCATTTGGTTTTGGCCTGGCCATTTTGGTTCAAGCCCTTGCCTCCGTGGTGGGCGTGGCTTATTCTCTGAAATCCCTGAATATTGTTTGCATATTTACGTACCAACTGAAACTGCACTGTGACGCCTTGGCAAGCCAGCTACTCCGTCTGGACTCTCGGCTTCCAGGATCCTATCAGGAACTAAGGATTTTGATTACTTACCATTGTCGTATCTTCGATATTGGAGAGCAAGTCAATCAGATCTTGAACTCTTATTTCCTGAGTAGCCTAATATTTTCTACTATCGCCATTTGTATGACAAGTGTTGCCGTCCTGCTACTCGACTTTGCCTCTGCCTTTAAATATATTAGTGGCCTGGTGGCCTTCGTCCTCTACCACTTCGTCATCTGCTACATGGGCACCGCCGTTACAGCAGCGAGCGACAAAGTGTTGCCAGCTGCCTTTTATAACAATTGGTATGAGGGTGATCTTGCTTATCGCAAGATGCTGCTGATCTTGATGATGCGTGCTACAAAGCCTTATGTTTGGAGAACCTACAAGCTGGCACCTGTGTCGATTACCACCTATATGGCAACTTTGAAGTTTTCTTATCAAATGTTTACCTGCGTGCGTTCTTTGAAATAA

>DsuzOR69aE_NotCloned

ATGCATTACGAGGATATTATACACTATACTGACATAGCCTGTCGATGGGCTCTGATGCCAAGATTTGAATGGAAGGGTCGAAAGTCACCGAGAGCCGAGGAAACATGGATACAAAAAATATTTTTCATAGCCGCTGCCATCAACCTAAGCTATTACAATGTTTCTTTCACTGTCTACGCCTATCAACTTGATCCGGAAACTACAGATCCTTTGATATATACTGGAAAGATTTCGGAGGCTGGCAGTATGCTGGGATTTGTCGTTTTAGGAACTCTTAATATGTTTTCACTTCTAATACTTAGGCCTCAGATTGAGAATGTGCTGGCAGAACTTCAGGATTTGTTTAATCAAAAATTAAAGAATACTTCTTCAGTCGGCTATCGTCTAAAGAAATCAATTCGATTGATGAGAAATTGTACTGTGTTATTTGCATTTGGTAACACCTACTACAACGTAATGCCTTTTATAAACATGGCTTACCAAATTCTAACGGACTCAAAGCAAGTTTCTTATATAATACAAAACGATGCTTGGTACCCCTGGAAAATTGGGGATTCTATTCCTGGTCTATGCGCTTTATATATAAGTCAAGCCCTGTCTTCAATACTAAATGTTGGCACTATTATAACTAATCAGTTATTGATACATGTCTGTACCATACAATTAGAACTACATTTCGATGGATTATCAAATCAACTGGAAAACTTAGATGCCAAGGACTTAAGAGCTAAGGGAATACTCATTTCACTAATTTGTTACCATCAGAGAATAATGCAGCTAGCGGACAGTATTAACGGAATTTTTAACTTTACCTTTTTGATTAGTTTAACTACTTCTACTATTGCCGTGTGCTCTATGTCCTTCACTTTAACCACGCTCGATATGATGACAGCTCTTAAATATACGGTGGGACTTCTTTTATTTATGATCTACACTTTTTCCCTATGTCACAATGGTACTCTGGTATCTTTGGCGAGCGACAAAGTGTTGCCAGCTGCTTTTTATAACAATTGGTATGAGGGTGATCTTGCCTATCGCAAGATGCTGCTGATCTTGATGATGCGTGCTACAAAACCTTATGTGTGGAGAACCTACAAGCTAGCACCTGTGTCGATTACCACCTATATGGCAACTTTGAAGTTTTCTTATCAAATGTTTACCTGCGTGCGTTCCCTGAAATAA
